# Supplementary material
Source: HighWire-hosted journal article supplement (doi:10.1101/rna.079427.122)
Supplement: Supplemental_Data.xlsx [file Supplemental_Data.xlsx]

## Sheet: TOC
Title
Cotranscriptional RNA strand displacement underlies the regulatory function of a translational riboswitch
Authors
Berman, K., Steans, R.S., Yu, A. M., Hertz, L. M., Lucks, J. B.
Figure	Experiment	Type
Figure 1B	Anti-RBS Sequestering Mutants	Flow Cytometry
Figure 1D	Rho-mediated termination assay	Flow Cytometry
Figure 2C	Linker Deletions	Flow Cytometry
Figure 3	Mismatch Mutants	Flow Cytometry
Figure 4A	P1 Lengthen/Shorten	Flow Cytometry
Figure 4B	AntiSequester Lengthen/Shorten	Flow Cytometry
SI Figure 2	Flow Cytometry µMFITC Conversion Example	Flow Cytometry
SI Figure 3	Ligand Non-binding Mutants	Flow Cytometry
Si Figure 4	Dose Response Curve	Flow Cytometry
SI Figure 6	P1 Shortening Mutants Set 2	Flow Cytometry
SI Figure 7	Anti-Sequestering Set 2	Flow Cytometry

## Sheet: 1B_SeqStemMuts
Values below in MEFL: MEFL in µM FITC
Conversion Factor/ Date:
20201030	μM FITC = (0.89532 * sfGFP Fluorescence (RFU)) + 0.01126
20210430	μM FITC = (1.53211 * sfGFP Fluorescence (RFU)) + 0.02086
20210612	μM FITC = (1.65657 * sfGFP Fluorescence (RFU)) + 0.02033
Strain	Date	[mMTPP]	Replicate 1	Replicate 2	Replicate 3		Strain	Date	[mMTPP]	Replicate 1	Replicate 2	Replicate 3
Blank	20201030	0	35.02	24.99	25.17		Blank	20201030	10	25.26	21.68	21.95
	20210430	0	34.5	29.74	29.75			20210430	10	30.05	31.58	28.82
	20210612	0	32.32	32.82	34.15			20210612	10	31.83	29.01	27.35
thiB WT	20201030	0	4355.8	3919.73	5029.93		thiB WT	20201030	10	1574.78	1568.61	178.46
	20210430	0	11225.8	6706.09	11365.2			20210430	10	1539.8	1731.31	1680.8
	20210612	0	12725.8	11993.6	7297.2			20210612	10	2165.15	2218.16	1727.82
thiB G17C	20201030	0	4989.64	5569.81	5251.07		thiB G17C	20201030	10	4919.8	5152.59	5408.54
	20210430	0	9512.92	8887.82	9660.01			20210430	10	6886.88	7662.13	8363.84
	20210612	0	9578.29	10504.3	12785.4			20210612	10	8195.06	9477.24	12237.1
Anti-RBS Mutant	20201030	0	3855.27	4057.61	3190.04		SeqStem Anti-RBS MM	20201030	10	4737.16	4916.22	4048.66
	20210430	0	5295.01	4965.6	4954.88			20210430	10	6670.85	7188.7	6267.9
	20210612	0	5600.87	5466.69	5564.43			20210612	10	10736.2	8325.92	8519.74

## Sheet: 1D_BCM
Values below in MEFL: MEFL in µM FITC
Conversion Factor/ Date:
20200305	μM FITC = (1.5122609* sfGFP Fluorescence (RFU)) + 0.0210925
20200806	μM FITC = (1.5122609 * sfGFP Fluorescence (RFU)) + 0.0210925
20220423	μM FITC = (1.5392561 * sfGFP Fluorescence (RFU)) + 0.0227159
Strain	Date	[mM TPP]	[µM BCM]	Replicate 1	Replicate 2	Replicate 3		Strain	Date	[mM TPP]	[µM BCM]	Replicate 1	Replicate 2	Replicate 3
Blank	20200305	0	0	27.85	29.21	29.96		Blank	20200305	10	0	29.96	28.45	28.91
	20200806	0	0	44.5	32.99	32.23			20200806	10	0	33.29	29.21	31.17
	20220423	0	0	31.73	32.04				20220423	10	0	36.35	30.5
thiB WT	20200305	0	0	8384	9173.4	8790.8		thiB WT	20200305	10	0	1001.14	1206.85	1108.51
	20200806	0	0	8570	10088.3	10799.1			20200806	10	0	1878.25	2451.4	2629.8
	20220423	0	0	6464.9	8255.05	8704.5			20220423	10	0	1480.79	1500.8	1643.95
thiB G17C	20200305	0	0	8046.76	6988.18	7520.49		thiB G17C	20200305	10	0	6983.64	6218.44	7195.36
	20200806	0	0	7853.19	7907.63	10333.3			20200806	10	0	6788.56	6297.08	10484.5
	20220423	0	0	7196.04	7540.84	7123.7			20220423	10	0	6244.78	6708.1	5855.35
Strain	Date	[mM TPP]	[µg BCM]	Replicate 1	Replicate 2	Replicate 3		Strain	Date	[mM TPP]	[µg BCM]	Replicate 1	Replicate 2	Replicate 3
Blank	20200305	0	10	29.21	28	30.57		Blank	20200305	10	10	28.8	28.8	28.8
	20200806	0	10	36.16	29.36	30.12			20200806	10	10	38.13	30.87	29.81
	20220423	0	10	52.2	46.51				20220423	10	10	40.35	36.04
thiB WT	20200305	0	10	8698.55	9618	9445.6		thiB WT	20200305	10	10	1144.8	1258.22	1211.34
	20200806	0	10	16033	19667	20211.4			20200806	10	10	2897.51	2791.65	2894.49
	20220423	0	10	16393.1	24982.2	15295.6			20220423	10	10	2305.83	2803.01	2818.4
thiB G17C	20200305	0	10	7609.72	6799.15	8234.28		thiB G17C	20200305	10	10	7750.36	5628.66	7422.2
	20200806	0	10	10729.5	10855	18113.9			20200806	10	10	9386.62	9720.83	14127.6
	20220423	0	10	16517.8	21015.5	11935			20220423	10	10	12013.9	12754.3	10325.4

## Sheet: 2C_Linker
Values below in MEFL: MEFL in µM FITC
Conversion Factor/ Date:
20201023	μM FITC = (0.89741* sfGFP Fluorescence (RFU)) + 0.01102
20210618	μM FITC = (1.55587 * sfGFP Fluorescence (RFU)) + 0.01874
20210625	μM FITC = (1.55587 * sfGFP Fluorescence (RFU)) + 0.01874
Strain	Date	[mMTPP]	Replicate 1	Replicate 2	Replicate 3		Strain	Date	[mMTPP]	Replicate 1	Replicate 2	Replicate 3
Blank	20201023	0	20.4719	20.5617	21.3694		Blank	20201023	10	18.2284	17.1515	16.9721
	20210618	0	27.2464	27.8688	27.7132			20210618	10	27.0908	25.535	26.9352
	20210625	0	33.3143	31.914	29.269			20210625	10	33.6255	30.2026	28.1799
thiB WT	20201023	0	7352.49	6638.15	7351.59		thiB WT	20201023	10	1441.25	1102.93	1357.79
	20210618	0	9985.57	9076.95	9066.05			20210618	10	1544.99	1560.55	1744.15
	20210625	0	4484.03	4230.42	3590.96			20210625	10	1319.39	1587	1464.09
thiB G17C	20201023	0	5277.68	5723.69	5511.9		thiB G17C	20201023	10	3845.41	4456.55	4497.83
	20210618	0	7746.68	7009.2	6855.17			20210618	10	6699.58	6754.04	6319.95
	20210625	0	3788.55	3598.74	5658.71			20210625	10	5363.09	5411.32	5568.47
Full Linker Deletion	20201023	0	479.228	462.177	549.226		Full Linker Deletion	20201023	10	136.417	131.93	159.75
	20210618	0	583.469	633.257	608.363			20210618	10	189.834	161.829	168.052
	20210625	0	444.997	384.318	382.762			20210625	10	189.834	192.946	174.276
Randomized Linker 1	20201023	0	232.44	298.848	242.312		Randomized Linker 1	20201023	10	79.1625	111.29	93.3416
	20210618	0	351.645	325.195	329.862			20210618	10	136.157	131.645	131.956
	20210625	0	233.399	220.952	264.516			20210625	10	136.313	123.71	139.113
Randomized Linker 2	20201023	0	113.085	109.495	113.982		Randomized Linker 2	20201023	10	83.2009	86.1623	94.239
	20210618	0	164.941	171.164	177.388			20210618	10	103.173	127.444	101.928
	20210625	0	121.532	142.847	160.273			20210625	10	135.846	104.729	106.129
Loop Deletion	20201023	0	3511.57	3656.95	3721.57		Loop Deletion	20201023	10	330.258	361.667	330.258
	20210618	0	4023.49	4700.29	4508.92			20210618	10	365.647	449.664	412.323
	20210625	0	2448.95	2288.7	2683.89			20210625	10	452.776	415.435	413.879
Loop Randomized 1	20201023	0	10360.6	10120.1	10297.8		Loop Randomized 1	20201023	10	1391	1450.22	1330.87
	20210618	0	12952.6	13053.7	13592.1			20210618	10	1415.86	1588.56	1548.11
	20210625	0	10682.6	10133.4	10797.7			20210625	10	1643.01	1755.04	1688.13
Loop Randomized 2	20201023	0	4858.59	4436.8	4115.53		Loop Randomized 2	20201023	10	323.078	396.666	314.104
	20210618	0	5941.87	7194.35	1376.96			20210618	10	345.421	420.103	27.2464
	20210625	0	4471.58	3634.52	4806.09			20210625	10	395.209	395.209	359.424
Invader Deletion	20201023	0	155.263	151.673	195.646		Invader Deletion	20201023	10	53.3171	61.8425	62.9194
	20210618	0	224.064	208.505	206.949			20210618	10	94.4598	95.0822	88.392
	20210625	0	152.027	157.161	168.052			20210625	10	93.3707	92.904	91.5037
Invader Randomzied 1	20201023	0	245.004	257.567	218.081		Invader Randomzied 1	20201023	10	74.3165	68.9321	73.8678
	20210618	0	343.865	346.977	370.315			20210618	10	103.795	111.108	119.976
	20210625	0	266.072	306.524	315.86			20210625	10	116.709	125.11	116.864
Invader Randomized 2	20201023	0	527.688	428.973	424.486		Invader Randomized 2	20201023	10	104.11	87.4187	83.7393
	20210618	0	564.798	600.583	572.578			20210618	10	123.243	145.181	128.689
	20210625	0	521.234	434.106	463.667			20210625	10	132.89	129.156	128.689

## Sheet: 3_Mismatches
Values below in MEFL: MEFL in µM FITC
Conversion Factor/ Date:
20200824	μM FITC = (0.89741* sfGFP Fluorescence (RFU)) + 0.01102
20201023	μM FITC = (1.55587 * sfGFP Fluorescence (RFU)) + 0.01874
20201029	μM FITC = (1.55587 * sfGFP Fluorescence (RFU)) + 0.01874
Strain	Date	[mMTPP]	Replicate 1	Replicate 2	Replicate 3		Strain	Date	[mMTPP]	Replicate 1	Replicate 2	Replicate 3
Blank	20200824	0	27.6526	27.5171	31.7167		Blank	20200824	10	30.7684	21.1501	23.1821
	20201023	0	17.2413	17.0618	17.69			20201023	10	16.2541	15.267	16.7028
	20201029	0	17.2014	17.0224	17.6491			20201029	10	16.3061	15.2317	15.6794
thiB WT	20200824	0	8824.45	8431.59	9462.51		thiB WT	20200824	10	1888.45	1811.23	2044.24
	20201023	0	8711.16	8369.25	8789.24			20201023	10	1382.02	1333.56	1375.74
	20201029	0	8690.9	8349.78	8768.79			20201029	10	1597.26	1466.55	1588.31
thiB G17C	20200824	0	7151.41	7300.42	7132.44		thiB G17C	20200824	10	4847.09	6010.76	4622.21
	20201023	0	7643.25	7581.33	7701.58			20201023	10	5220.24	4846.02	4966.27
	20201029	0	7625.47	7563.69	7683.66			20201029	10	5332.55	4928.76	5574.28
Invader Mismatch 1	20200824	0	180.19	180.19	233.023		Invader Mismatch 1	20200824	10	100.941	92.6776	116.52
	20201023	0	111.29	110.392	149.878			20201023	10	60.8554	61.2143	62.1117
	20201029	0	111.031	110.136	149.53			20201029	10	83.8134	77.0985	88.469
Invader Mismatch 2	20200824	0	189.673	185.609	184.254		Invader Mismatch 2	20200824	10	97.5544	92.5421	85.7687
	20201023	0	129.238	179.493	154.365			20201023	10	73.9575	65.8809	77.0087
	20201029	0	128.938	179.076	154.007			20201029	10	88.29	93.1247	88.469
Invader Rescue 1	20200824	0	9610.17	8636.15	8552.16		Invader Rescue 1	20200824	10	8599.57	8724.2	7109.41
	20201023	0	10405.5	8589.12	8468.86			20201023	10	6409.31	6685.71	7225.95
	20201029	0	10381.3	8569.13	8449.16			20201029	10	9034.7	7851.98	6953.08
Invader Rescue 2	20200824	0	10824	11747.9	12186.8		Invader Rescue 2	20200824	10	9870.27	9308.07	9467.92
	20201023	0	11748.9	13844.3	12251.4			20201023	10	9431.78	9155.38	7315.69
	20201029	0	11721.6	13812.1	12222.9			20201029	10	9169	10186.1	8146.54
Incumbent Mismatch 1	20200824	0	9022.23	9146.86	9191.57		Incumbent Mismatch 1	20200824	10	5688.35	6100.17	7659.42
	20201023	0	9412.04	8558.6	8753.34			20201023	10	6072.78	5925.6	5711.12
	20201029	0	9390.14	8538.69	8732.98			20201029	10	5012.02	7149.15	7826.02
Incumbent Mismatch 2	20200824	0	8934.18	-	10868.7		Incumbent Mismatch 2	20200824	10	6986.14	7309.91	9350.07
	20201023	0	8724.62	8141.31	8175.41			20201023	10	5951.63	5828.68	4700.64
	20201029	0	8704.33	8122.37	8156.39			20201029	10	6483.03	6942.33	6922.64
Incumbent Rescue 1	20200824	0	53.1207	50.1404	49.4631		Incumbent Rescue 1	20200824	10	33.7487	31.8521	32.394
	20201023	0	58.0734	43.8943	35.6382			20201023	10	18.6771	18.4079	19.6643
	20201029	0	57.9386	43.7925	35.5555			20201029	10	27.7662	22.3943	25.6175
Incumbent Rescue 2	20200824	0	70.7316	70.0543	66.1257		Incumbent Rescue 2	20200824	10	34.8324	29.8201	29.6846
	20201023	0	33.0357	38.6894	42.638			20201023	10	20.113	18.6771	19.8438
	20201029	0	32.9591	38.5996	42.539			20201029	10	24.1849	22.4838	20.4246
Full Rescue 1	20200824	0	7415.57	7239.46	6900.79		Full Rescue 1	20200824	10	871.081	693.617	747.804
	20201023	0	5919.32	3152.61	7732.09			20201023	10	524.995	546.533	553.713
	20201029	0	5905.55	3145.28	7714.1			20201029	10	475.427	684.037	691.2
Full Rescue 2	20200824	0	15829.5	15496.3	14384.1		Full Rescue 2	20200824	10	3172.69	3306.81	2964.07
	20201023	0	17093.9	16097.7	18460.6			20201023	10	1968.93	1441.25	1731.11
	20201029	0	17054.1	16060.3	18417.7			20201029	10	1699.33	1860.49	1876.61

## Sheet: 4A_P1Muts
Conversion Factor/Date:
20220709	μM FITC = (1.431245* sfGFP Fluorescence (RFU))
Strain	Date	[mMTPP]	Replicate 1	Replicate 2	Replicate 3			Strain	Date	[mMTPP]	Replicate 1	Replicate 2	Replicate 3
Blank	20220709	0	29.0543	28.1955	27.4799			Blank	20220709	10	32.0599	24.3312	26.7643
WT	20220709	0	10250.6	9941.43	10860.3			WT	20220709	10	1714.63	1495.65	1605.86
G17C	20220709	0	8962.46	10011.6	8397.12			G17C	20220709	10	7008.81	7389.52	6805.57
P1 +2	20220709	0	1155.01	1239.46	1418.36			P1 +2	20220709	10	970.384	857.316	865.903
P1 +3	20220709	0	294.836	293.405	269.074			P1 +3	20220709	10	136.398	150.281	150.281
P1 +5	20220709	0	213.256	197.512	188.924			P1 +5	20220709	10	144.556	139.69	139.546
P1-1 Set 1	20220709	0	8956.73185941027	8232.52	19971.6			P1-1 Set 1	20220709	10	820.103	838.71	901.684
P1 -2 Set 1	20220709	0	11532.973046201300	10936.1	12453.3			P1 -2 Set 1	20220709	10	6708.25	5783.66	6805.57
P1 -3 Set 1	20220709	0	12866.8934829176	15068.1	15974.1			P1 -3 Set 1	20220709	10	8670.48	10189	10453.8
P1 -4 Set 1	20220709	0	15330.066306510600	16440.7	12749.5			P1 -4 Set 1	20220709	10	8674.78	9202.91	9945.72

## Sheet: 4B_AntiSeqMuts
Conversion Factor/Date:
20220709	μM FITC = (1.431245* sfGFP Fluorescence (RFU))
Strain	Date	[mMTPP]	Replicate 1	Replicate 2	Replicate 3			Strain	Date	[mMTPP]	Replicate 1	Replicate 2	Replicate 3
Blank	20220709	0	22.1843	22.6137	22.3274			Blank	20220709	10	25.7624	24.3312	23.3293
WT	20220709	0	8667.62	8321.26	8126.61			WT	20220709	10	1872.07	1823.41	1801.94
G17C	20220709	0	6809.86	6512.17	6645.27			G17C	20220709	10	8328.42	8087.97	8052.18
+2 Set 1	20220709	0	16082.901231095100	14550	13679.8			+2 Set 1	20220709	10	9921.39	8604.65	7639.99
+4 Set 1	20220709	0	13515.247514926700	12793.9	12645.1			+4 Set 1	20220709	10	7388.09	6967.3	7305.08
+6 Set 1	20220709	0	14575.80013682230	14834.9	14750.4			+6 Set 1	20220709	10	9909.94	10104.6	9995.82
+8 Set1	20220709	0	13303.4	12844	12650.8			+8 Set1	20220709	10	7833.2	7491.14	7714.41
-1 Set 1	20220709	0	8118.022228599400	7599.91	8510.18			-1 Set 1	20220709	10	1441.26	1290.98	1439.83
-2 Set 1	20220709	0	4953.53930415771	5099.53	4869.1			-2 Set 1	20220709	10	390.73	433.667	691.291
-3 Set 1	20220709	0	450.8422076884370	463.723	397.886			-3 Set 1	20220709	10	111.637	118.221	103.765
-4 Set 1	20220709	0	73.2797493131681	66.2666	120.654			-4 Set 1	20220709	10	46.8017	44.798	75.5697

## Sheet: SI2_QC
Peak	Measured Relative Intensity Value	Relative Channel Number	MEFL (F)
2	451	451	692
3	1254	1254	2192
4	3721	3721	6028
5	9223	9223	17493
6	25954	25954	35674
7	79543	79543	126907
8	174720	174720	290983
	m	b	r2
	1.64896	0.0191018	0.999195
	MEFL = 1.649*RFU + 0.0191
	*Calibration Curve Collected with each dataset and recalculated for each day.
	slope	1.64896	0	intercept
	+	0.0191018	#N/A
	r^2	0.999195	3705.38	s(y)
	F	7451.99	6	dof
	regression ss	1.02314e+11	8.23789e+07	residual ss

## Sheet: SI3_Ligand_Nonbinding_Mut
Values below in MEFL: MEFL in µM FITC
Conversion Factor/ Date:
20210625	μM FITC = (4.42095* sfGFP Fluorescence (RFU)) + 0.05518
20210701	μM FITC = (0.65666 * sfGFP Fluorescence (RFU)) + 0.04662
20210714	μM FITC = (4.14336 * sfGFP Fluorescence (RFU)) + 0.05353
Strain	Date	[mMTPP]	Replicate 1	Replicate 2	Replicate 3		Strain	Date	[mMTPP]	Replicate 1	Replicate 2	Replicate 3
Blank	20210625	0	69.464	70.3482	70.3482		Blank	20210625	10	69.9061	65.4852	63.2747
	20210701	0	10.8816	14.9529	14.1649			20210701	10	13.3112	13.1142	12.3263
	20210714	0	81.2634	83.7494	79.1917			20210714	10	77.9487	77.5344	77.1201
thiB WT	20210625	0	23210	23899.7	20526.5		thiB WT	20210625	10	4199.95	4217.64	4089.43
	20210701	0	1945.74	2655.6	832.698			20210701	10	505.679	515.529	277.816
	20210714	0	23020.6	25842.2	23795.4			20210714	10	3629.64	3840.95	3903.1
thiB G17C	20210625	0	18024.2	19646.7	18077.3		thiB G17C	20210625	10	15088.7	15831.5	14783.7
	20210701	0	2761.32	2778.4	2635.9			20210701	10	2431.02	2343.68	2503.91
	20210714	0	16134.3	18015.4	20294.2			20210714	10	13470.1	15906.4	15090.2
thiB G37C	20210625	0	18992.4	21362.1	19297.5		thiB G37C	20210625	10	16463.7	18382.3	14704.1
	20210701	0	2937.31	2606.35	2352.88			20210701	10	2784.31	2344.34	1761.88
	20210714	0	17074.8	15516.9	14721.4			20210714	10	14452.1	14012.9	14443.8
thiB U66A	20210625	0	31477.2	30681.4	29293.2		thiB U66A	20210625	10	27109.3	26892.7	25562
	20210701	0	4875.78	4859.37	4946.7			20210701	10	4007.67	4206.64	3922.96
	20210714	0	31303.1	29658.2	26496.9			20210714	10	27101.8	27354.5	23861.7
thiB G76C	20210625	0	35394.1	30177.4	35071.4		thiB G76C	20210625	10	30504.6	35349.9	31242.9
	20210701	0	4391.17	4382.63	-			20210701	10	4787.13	4395.76	-
	20210714	0	30408.2	-	-			20210714	10	31879.1	-	-

## Sheet: SI4_DoseResponse
Values below in MEFL: MEFL in µM FITC
Conversion Factor/ Date:							Strain	Date	[mMTPP]	Replicate 1	Replicate 2	Replicate 3
20200117	μM FITC = (1.5122609* sfGFP Fluorescence (RFU)) + 0.0210946						Blank	20200117	0	24.3685	25.2758	26.4857
20200217	μM FITC = (1.51226 * sfGFP Fluorescence (RFU)) + 0.02109							20200217	0	30.5688	28.754	28.9053
20200228	μM FITC = (1.51226 * sfGFP Fluorescence (RFU)) + 0.02109							20200228	0	29.2077	25.8808	26.3344
Strain	Date	[mMTPP]	Replicate 1	Replicate 2	Replicate 3		Strain	Date	[mMTPP]	Replicate 1	Replicate 2	Replicate 3		Strain	Date	[mMTPP]	Replicate 1	Replicate 2	Replicate 3		Strain	Date	[mMTPP]	Replicate 1	Replicate 2	Replicate 3		Strain	Date	[mMTPP]	Replicate 1	Replicate 2	Replicate 3
thiB WT	20200117	0	8790.79	9881.13	11343.5		thiB WT	20200117	0.005	4043.81	4886.14	3145.52		thiB WT	20200117	0.01	6021.84	9001	10480		thiB WT	20200117	0.05	2814.34	3757.99	2909.61		thiB WT	20200117	0.1	3768.58	3131.91	3366.31
	20200217	0	7807.82	7972.66	7780.6			20200217	0.005	2855.17	2965.56	3219.62			20200217	0.01	3240.8	3082.01	3301.29			20200217	0.05	3116.79	3671.79	3853.26			20200217	0.1	2927.76	3274.07	3423.78
	20200228	0	7320.88	8258.48	7898.56			20200228	0.005	2404.52	2300.17	2384.86			20200228	0.01	2265.39	2239.68	2191.29			20200228	0.05	2076.36	2177.68	1978.06			20200228	0.1	1746.68	2129.28	1968.98
thiB G17C	20200117	0	8166.23	9672.44	7329.95		thiB G17C	20200117	0.005	10555.6	13654.2	13672.4		thiB G17C	20200117	0.01	7224.09	9950.7	5645.29		thiB G17C	20200117	0.05	11493.2	12768	10082.3		thiB G17C	20200117	0.1	8554.88	6551.14	9177.93
	20200217	0	6924.66	6982.13	7325.41			20200217	0.005	7041.11	7186.28	6829.39			20200217	0.01	8317.46	7765.48	6750.75			20200217	0.05	8734.84	8326.53	8486.83			20200217	0.1	7641.48	8179.84	9052.41
	20200228	0	6148.87	5798.03	6036.97			20200228	0.005	6176.09	6551.14	6353.03			20200228	0.01	5495.58	5621.09	6088.38			20200228	0.05	5782.91	5909.94	6148.87			20200228	0.1	5813.15	5909.94	5832.81
Strain	Date	[mMTPP]	Replicate 1	Replicate 2	Replicate 3		Strain	Date	[mMTPP]	Replicate 1	Replicate 2	Replicate 3		Strain	Date	[mMTPP]	Replicate 1	Replicate 2	Replicate 3		Strain	Date	[mMTPP]	Replicate 1	Replicate 2	Replicate 3		Strain	Date	[mMTPP]	Replicate 1	Replicate 2	Replicate 3
thiB WT	20200117	0.5	3809.41	4240.4	3993.9		thiB WT	20200117	1	3665.74	3479.73	2714.53		thiB WT	20200117	5	2218.51	2818.88	2387.88		thiB WT	20200117	10	1758.78	2058.21	1825.32		thiB WT	20200117	25	1170.51	1078.26	1252.17
	20200217	0.5	2536.08	2951.95	3284.65			20200217	1	2421.15	2856.68	2672.19			20200217	5	1855.57	1982.6	2371.25			20200217	10	2250.27	2241.19	2009.82			20200217	25	907.378	989.04	845.375
	20200228	0.5	1804.15	1743.66	1714.92			20200228	1	1950.84	2105.09	1975.03			20200228	5	1606.04	1509.26	1559.16			20200228	10	809.081	890.743	801.519			20200228	25	434.04	483.945	461.261
thiB G17C	20200117	0.5	4665.35	6257.76	5925.06		thiB G17C	20200117	1	8684.94	8949.58	8653.18		thiB G17C	20200117	5	6284.98	5841.88	7320.88		thiB G17C	20200117	10	6935.25	5785.93	6091.41		thiB G17C	20200117	25	4598.81	5985.55	5131.12
	20200217	0.5	9131.05	9418.38	8067.93			20200217	1	7136.38	7679.28	8839.19			20200217	5	6607.09	6989.69	7281.56			20200217	10	9764.69	8553.37	9070.56			20200217	25	7437.32	7166.63	6475.52
	20200228	0.5	5241.52	5637.73	5459.28			20200228	1	5680.07	5819.2	5357.96			20200228	5	5277.81	5200.69	5131.12			20200228	10	5099.36	5728.47	5342.84			20200228	25	4057.42	4500.51	3990.88

[truncated: 2 more sheets: SI6_P1Shortening_Set2, SI7_AntiSeqMuts_Set2]
