# Supplementary material
Source: HighWire-hosted journal article supplement (doi:10.1101/rna.079427.122)
Supplement: Supplemental_Data_File.xlsx [file Supplemental_Data_File.xlsx]

## Sheet: Usage Key
Riboswitch reporter constructs were made in E. coli as follows:
1) Promoter Sequence (Example: Strain ID J23119 Constituitive Promoter)
ttgacagctagctcagtcctaggtataatactagt
2) Riboswitch Sequence (Example: Strain ID E. coli thiB TPP Riboswitch)
CCGTTCTCAACGGGGTGCCACGCGTACGCGTGCGCTGAGAAAATACCCGTCGAACCTGATCCGGATAACGCCGGCGAAGGGATTTGAGGCTCCTTCTCAAGTCCTTTGCCACTCTTTTTTGAGGTGCAAAgtgTTAAAAAAA
3) Reporter Gene (sfGFP)
atgagcaaaggagaagaacttttcactggagttgtcccaattcttgttgaattagatggtgatgttaatgggcacaaattttctgtccgtggagagggtgaaggtgatgctacaaacggaaaactcacccttaaatttatttgcactactggaaaactacctgttccgtggccaacacttgtcactactctgacctatggtgttcaatgcttttcccgttatccggatcacatgaaacggcatgactttttcaagagtgccatgcccgaaggttatgtacaggaacgcactatatctttcaaagatgacgggacctacaagacgcgtgctgaagtcaagtttgaaggtgatacccttgttaatcgtatcgagttaaagggtattgattttaaagaagat…
Assembled construct:
ttgacagctagctcagtcctaggtataatactagtCCGTTCTCAACGGGGTGCCACGCGTACGCGTGCGCTGAGAAAATACCCGTCGAACCTGATCCGGATAACGCCGGCGAAGGGATTTGAGGCTCCTTCTCAAGTCCTTTGCCACTCTTTTTTGAGGTGCAAAgtgTTAAAAAAAatgagcaaaggagaagaacttttcactggagttgtcccaattcttgttgaattagatggtgatgttaatgggcacaaattttctgtccgtggagagggtgaaggtgatgctacaaacggaaaactcacccttaaatttatttgcactactggaaaactacctgttccgtggccaacacttgtcactactctgacctatggtgttcaatgcttttcccgttat…

## Sheet: Sequences
Strain ID	Figure	Sequence	Addgene ID	Plasmid Number
J23119 Promoter		ttgacagctagctcagtcctaggtataatactagt
sfGFP		atgagcaaaggagaagaacttttcactggagttgtcccaattcttgttgaattagatggtgatgttaatgggcacaaattttctgtccgtggagagggtgaaggtgatgctacaaacggaaaactcacccttaaatttatttgcactactggaaaactacctgttccgtggccaacacttgtcactactctgacctatggtgttcaatgcttttcccgttatccggatcacatgaaacggcatgactttttcaagagtgccatgcccgaaggttatgtacaggaacgcactatatctttcaaagatgacgggacctacaagacgcgtgctgaagtcaagtttgaaggtgatacccttgttaatcgtatcgagttaaagggtattgattttaaagaagat…
thiB WT Riboswitch Sequence		CCGTTCTCAACGGGGTGCCACGCGTACGCGTGCGCTGAGAAAATACCCGTCGAACCTGATCCGGATAACGCCGGCGAAGGGATTTGAGGCTCCTTCTCAAGTCCTTTGCCACTCTTTTTTGAGGTGCAAAgtgTTAAAAAAA	183838	6401
Blank Empty Vector (rrnB Term-CmR-p15a ORI		taaggatctgaagcttgggcccgaacaaaaactcatctcagaagaggatctgaatagcgccgtcgaccatcatcatcatcatcattgagtttaaacggtctccagcttggctgttttggcggatgagagaagattttcagcctgatacagattaaatcagaacgcagaagcggtctgataaaacagaatttgcctggcggcagtagcgcggtggtcccacctgaccccatgccgaactcagaagtgaaacgccgtagcgccgatggtagtgtggggtctccccatgcgagagtagggaactgccaggcatcaaataaaacgaaaggctcagtcgaaagactgggcctttcgttttatctgttgtttgtcggtgaactggatccttactcgagtctagac…
thiB G17C	1,SI,3,4	CCGTTCTCAACGGGGTCCCACGCGTACGCGTGCGCTGAGAAAATACCCGTCGAACCTGATCCGGATAACGCCGGCGAAGGGATTTGAGGCTCCTTCTCAAGTCCTTTGCCACTCTTTTTTGAGGTGCAAAgtgTTAAAAAAA	183839	6402
thiB G37C	SI	CCGTTCTCAACGGGGTGCCACGCGTACGCGTGCGCTCAGAAAATACCCGTCGAACCTGATCCGGATAACGCCGGCGAAGGGATTTGAGGCTCCTTCTCAAGTCCTTTGCCACTCTTTTTTGAGGTGCAAAgtgTTAAAAAAA	183840	6403
thiB U66A	SI	CCGTTCTCAACGGGGTGCCACGCGTACGCGTGCGCTGAGAAAATACCCGTCGAACCTGATCCGGAAAACGCCGGCGAAGGGATTTGAGGCTCCTTCTCAAGTCCTTTGCCACTCTTTTTTGAGGTGCAAAgtgTTAAAAAAA	183841	6404
thiB G76C	SI	CCGTTCTCAACGGGGTGCCACGCGTACGCGTGCGCTGAGAAAATACCCGTCGAACCTGATCCGGATAACGCCGGCCAAGGGATTTGAGGCTCCTTCTCAAGTCCTTTGCCACTCTTTTTTGAGGTGCAAAgtgTTAAAAAAA	183842	6405
thiB Seq Stem Mut	1	CCGTTCTCAACGGGGTGCCACGCGTACGCGTGCGCTGAGAAAATACCCGTCGAACCTGATCCGGATAACGCCGGCGAAGGGATTTGAGGCTCCTTCTCAAGTCCTTTCGTGGAGTTTTTTGAGGTGCAAAGTGTTAAAAAAA	183845	6408
thiB Del 90-99	2	CCGTTCTCAACGGGGTGCCACGCGTACGCGTGCGCTGAGAAAATACCCGTCGAACCTGATCCGGATAACGCCGGCGAAGGGATTTGAGGAGTCCTTTGCCACTCTTTTTTGAGGTGCAAAgtgTTAAAAAAA	183847	6410
thiB Rand 1 90-99	2	CCGTTCTCAACGGGGTGCCACGCGTACGCGTGCGCTGAGAAAATACCCGTCGAACCTGATCCGGATAACGCCGGCGAAGGGATTTGAGGttgaagatgaAGTCCTTTGCCACTCTTTTTTGAGGTGCAAAgtgTTAAAAAAA	183848	6411
thiB Rand 2 90-99	2	CCGTTCTCAACGGGGTGCCACGCGTACGCGTGCGCTGAGAAAATACCCGTCGAACCTGATCCGGATAACGCCGGCGAAGGGATTTGAGGccacagtaacAGTCCTTTGCCACTCTTTTTTGAGGTGCAAAgtgTTAAAAAAA	183849	6412
thiB Del 90-94	2	CCGTTCTCAACGGGGTGCCACGCGTACGCGTGCGCTGAGAAAATACCCGTCGAACCTGATCCGGATAACGCCGGCGAAGGGATTTGAGGCTCCTAGTCCTTTGCCACTCTTTTTTGAGGTGCAAAgtgTTAAAAAAA	183850	6413
thiB Rand 1 90-94	2	ccgttctcaacggggtgccacgcgtacgcgtgcgctgagaaaatacccgtcgaacctgatccggataacgccggcgaagggatttgaggattcctctcaagtcctttgccactcttttttgaggtgcaaagtgttaaaaaaa	183851	6414
thiB Rand 2 90-94	2	CCGTTCTCAACGGGGTGCCACGCGTACGCGTGCGCTGAGAAAATACCCGTCGAACCTGATCCGGATAACGCCGGCGAAGGGATTTGAGGgcagtTCTCAAGTCCTTTGCCACTCTTTTTTGAGGTGCAAAgtgTTAAAAAAA	183852	6415
thiB Del 95-99	2	CCGTTCTCAACGGGGTGCCACGCGTACGCGTGCGCTGAGAAAATACCCGTCGAACCTGATCCGGATAACGCCGGCGAAGGGATTTGAGGTCTCAAGTCCTTTGCCACTCTTTTTTGAGGTGCAAAgtgTTAAAAAAA	183853	6416
thiB Rand 1 95-99	2	CCGTTCTCAACGGGGTGCCACGCGTACGCGTGCGCTGAGAAAATACCCGTCGAACCTGATCCGGATAACGCCGGCGAAGGGATTTGAGGCTCCTGTACCAGTCCTTTGCCACTCTTTTTTGAGGTGCAAAgtgTTAAAAAAA	183854	6417
thiB Rand 2 95-99	2	CCGTTCTCAACGGGGTGCCACGCGTACGCGTGCGCTGAGAAAATACCCGTCGAACCTGATCCGGATAACGCCGGCGAAGGGATTTGAGGCTCCTCGGTCAGTCCTTTGCCACTCTTTTTTGAGGTGCAAAgtgTTAAAAAAA	183855	6418
thiB InvM1	3	CCGTTCTCAACGGGGTGCCACGCGTACGCGTGCGCTGAGAAAATACCCGTCGAACCTGATCCGGATAACGCCGGCGAAGGGATTTGAGGCTCCTAAGACAGTCCTTTGCCACTCTTTTTTGAGGTGCAAAgtgTTAAAAAAA	183856	6419
thiB InvM2	3	CCGTTCTCAACGGGGTGCCACGCGTACGCGTGCGCTGAGAAAATACCCGTCGAACCTGATCCGGATAACGCCGGCGAAGGGATTTGAGGCTCCTGGAGTAGTCCTTTGCCACTCTTTTTTGAGGTGCAAAgtgTTAAAAAAA	183861	6424
thiB InvR1	3	CCGTTCTCAACGGGGTGCCACGCGTACGCGTGCGCTGAGAAAATACCCGTCGAACCTGATCCGGATAACGCCGGCGAAGGGATTgtcttCTCCTAAGACAGTCCTTTGCCACTCTTTTTTGAGGTGCAAAgtgTTAAAAAAA	183857	6420
thiB InvR2	3	CCGTTCTCAACGGGGTGCCACGCGTACGCGTGCGCTGAGAAAATACCCGTCGAACCTGATCCGGATAACGCCGGCGAAGGGATTACTCTCTCCTGGAGTAGTCCTTTGCCACTCTTTTTTGAGGTGCAAAgtgTTAAAAAAA	183862	6425
thiB IncM1	3	CCGTAAGACACGGGGTGCCACGCGTACGCGTGCGCTGAGAAAATACCCGTCGAACCTGATCCGGATAACGCCGGCGAAGGGATTTGAGGCTCCTTCTCAAGTCCTTTGCCACTCTTTTTTGAGGTGCAAAgtgTTAAAAAAA	183859	6422
thiB IncM2	3	CCGTGGAGTACGGGGTGCCACGCGTACGCGTGCGCTGAGAAAATACCCGTCGAACCTGATCCGGATAACGCCGGCGAAGGGATTTGAGGCTCCTTCTCAAGTCCTTTGCCACTCTTTTTTGAGGTGCAAAgtgTTAAAAAAA	183864	6427
thiB IncR1	3	CCGTAAGACACGGGGTGCCACGCGTACGCGTGCGCTGAGAAAATACCCGTCGAACCTGATCCGGATAACGCCGGCGAAGGGATTGTCTTCTCCTTCTCAAGTCCTTTGCCACTCTTTTTTGAGGTGCAAAgtgTTAAAAAAA	183860	6423
thiB IncR2	3	CCGTGGAGTACGGGGTGCCACGCGTACGCGTGCGCTGAGAAAATACCCGTCGAACCTGATCCGGATAACGCCGGCGAAGGGATTACTCTCTCCTTCTCAAGTCCTTTGCCACTCTTTTTTGAGGTGCAAAgtgTTAAAAAAA	183865	6428
thiB FR1	3	CCGTAAGACACGGGGTGCCACGCGTACGCGTGCGCTGAGAAAATACCCGTCGAACCTGATCCGGATAACGCCGGCGAAGGGATTgtcttCTCCTAAGACAGTCCTTTGCCACTCTTTTTTGAGGTGCAAAgtgTTAAAAAAA	183858	6421
thiB FR2	3	CCGTGGAGTACGGGGTGCCACGCGTACGCGTGCGCTGAGAAAATACCCGTCGAACCTGATCCGGATAACGCCGGCGAAGGGATTACTCTCTCCTGGAGTAGTCCTTTGCCACTCTTTTTTGAGGTGCAAAgtgTTAAAAAAA	183863	6426
thiB P1 -1 Set 1	4A	CCGTACTCAACGGGGTGCCACGCGTACGCGTGCGCTGAGAAAATACCCGTCGAACCTGATCCGGATAACGCCGGCGAAGGGATTTGAGGCTCCTTCTCAAGTCCTTTGCCACTCTTTTTTGAGGTGCAAAgtgTTAAAAAAA
thiB P1 -1 Set 2	SI 5	CCGTGCTCAACGGGGTGCCACGCGTACGCGTGCGCTGAGAAAATACCCGTCGAACCTGATCCGGATAACGCCGGCGAAGGGATTTGAGGCTCCTTCTCAAGTCCTTTGCCACTCTTTTTTGAGGTGCAAAgtgTTAAAAAAA
thiB P1 -2 Set 1	4A	CCGTAATCAACGGGGTGCCACGCGTACGCGTGCGCTGAGAAAATACCCGTCGAACCTGATCCGGATAACGCCGGCGAAGGGATTTGAGGCTCCTTCTCAAGTCCTTTGCCACTCTTTTTTGAGGTGCAAAgtgTTAAAAAAA
thiB P1 -2 Set 2	SI 5	CCGTGGTCAACGGGGTGCCACGCGTACGCGTGCGCTGAGAAAATACCCGTCGAACCTGATCCGGATAACGCCGGCGAAGGGATTTGAGGCTCCTTCTCAAGTCCTTTGCCACTCTTTTTTGAGGTGCAAAgtgTTAAAAAAA
thiB P1 -3 Set 1	4A	CCGTAAGCAACGGGGTGCCACGCGTACGCGTGCGCTGAGAAAATACCCGTCGAACCTGATCCGGATAACGCCGGCGAAGGGATTTGAGGCTCCTTCTCAAGTCCTTTGCCACTCTTTTTTGAGGTGCAAAgtgTTAAAAAAA
thiB P1 -3 Set 2	SI 5	CCGTGGACAACGGGGTGCCACGCGTACGCGTGCGCTGAGAAAATACCCGTCGAACCTGATCCGGATAACGCCGGCGAAGGGATTTGAGGCTCCTTCTCAAGTCCTTTGCCACTCTTTTTTGAGGTGCAAAgtgTTAAAAAAA
thiB P1 -4 Set 1	4A	CCGTAAGAAACGGGGTGCCACGCGTACGCGTGCGCTGAGAAAATACCCGTCGAACCTGATCCGGATAACGCCGGCGAAGGGATTTGAGGCTCCTTCTCAAGTCCTTTGCCACTCTTTTTTGAGGTGCAAAgtgTTAAAAAAA
thiB P1 -4 Set 2	SI 5	CCGTGGAGAACGGGGTGCCACGCGTACGCGTGCGCTGAGAAAATACCCGTCGAACCTGATCCGGATAACGCCGGCGAAGGGATTTGAGGCTCCTTCTCAAGTCCTTTGCCACTCTTTTTTGAGGTGCAAAgtgTTAAAAAAA
thiB P1 +2	4A	CCGGCCTCAACGGGGTGCCACGCGTACGCGTGCGCTGAGAAAATACCCGTCGAACCTGATCCGGATAACGCCGGCGAAGGGATTTGAGGCTCCTTCTCAAGTCCTTTGCCACTCTTTTTTGAGGTGCAAAgtgTTAAAAAAA
thiB P1 +3	4A	CCAGCCTCAACGGGGTGCCACGCGTACGCGTGCGCTGAGAAAATACCCGTCGAACCTGATCCGGATAACGCCGGCGAAGGGATTTGAGGCTCCTTCTCAAGTCCTTTGCCACTCTTTTTTGAGGTGCAAAgtgTTAAAAAAA
thiB P1 +5	4A	GGAGCCTCAACGGGGTGCCACGCGTACGCGTGCGCTGAGAAAATACCCGTCGAACCTGATCCGGATAACGCCGGCGAAGGGATTTGAGGCTCCTTCTCAAGTCCTTTGCCACTCTTTTTTGAGGTGCAAAgtgTTAAAAAAA
thiB Anti-Seq -1 Set 1	4B	CCGTTCTCAACGGGGTGCCACGCGTACGCGTGCGCTGAGAAAATACCCGTCGAACCTGATCCGGATAACGCCGGCGAAGGGATTTGAGGCTCCTACTCAAGTCCTTTGCCACTCTTTTTTGAGGTGCAAAgtgTTAAAAAAA
thiB Anti-Seq -1 Set 2	SI 6	CCGTTCTCAACGGGGTGCCACGCGTACGCGTGCGCTGAGAAAATACCCGTCGAACCTGATCCGGATAACGCCGGCGAAGGGATTTGAGGCTCCTGCTCAAGTCCTTTGCCACTCTTTTTTGAGGTGCAAAgtgTTAAAAAAA
thiB Anti-Seq -2 Set 1	4B	CCGTTCTCAACGGGGTGCCACGCGTACGCGTGCGCTGAGAAAATACCCGTCGAACCTGATCCGGATAACGCCGGCGAAGGGATTTGAGGCTCCTAATCAAGTCCTTTGCCACTCTTTTTTGAGGTGCAAAgtgTTAAAAAAA
thiB Anti-Seq -2 Set 2	SI 6	CCGTTCTCAACGGGGTGCCACGCGTACGCGTGCGCTGAGAAAATACCCGTCGAACCTGATCCGGATAACGCCGGCGAAGGGATTTGAGGCTCCTGGTCAAGTCCTTTGCCACTCTTTTTTGAGGTGCAAAgtgTTAAAAAAA
thiB Anti-Seq -3 Set 1	4B	CCGTTCTCAACGGGGTGCCACGCGTACGCGTGCGCTGAGAAAATACCCGTCGAACCTGATCCGGATAACGCCGGCGAAGGGATTTGAGGCTCCTAAGAAAGTCCTTTGCCACTCTTTTTTGAGGTGCAAAgtgTTAAAAAAA
thiB Anti-Seq -3 Set 2	SI 6	CCGTTCTCAACGGGGTGCCACGCGTACGCGTGCGCTGAGAAAATACCCGTCGAACCTGATCCGGATAACGCCGGCGAAGGGATTTGAGGCTCCTGGACAAGTCCTTTGCCACTCTTTTTTGAGGTGCAAAgtgTTAAAAAAA
thiB Anti-Seq -4 Set 1	4B	CCGTTCTCAACGGGGTGCCACGCGTACGCGTGCGCTGAGAAAATACCCGTCGAACCTGATCCGGATAACGCCGGCGAAGGGATTTGAGGCTCCTAAGCAAGTCCTTTGCCACTCTTTTTTGAGGTGCAAAgtgTTAAAAAAA
thiB Anti-Seq -4 Set 2	SI 6	CCGTTCTCAACGGGGTGCCACGCGTACGCGTGCGCTGAGAAAATACCCGTCGAACCTGATCCGGATAACGCCGGCGAAGGGATTTGAGGCTCCTGGAGAAGTCCTTTGCCACTCTTTTTTGAGGTGCAAAgtgTTAAAAAAA
thiB Anti-Seq +2 Set 1	4B	CCGTTCTCAACGGGGTGCCACGCGTACGCGTGCGCTGAGAAAATACCCGTCGAACCTGATCCGGATAACGCCGGCGAAGGGATTTGAGGtgCTCCTcaTCTCAAGTCCTTTGCCACTCTTTTTTGAGGTGCAAAgtgTTAAAAAAA
thiB Anti-Seq +2 Set 2	SI 6	CCGTTCTCAACGGGGTGCCACGCGTACGCGTGCGCTGAGAAAATACCCGTCGAACCTGATCCGGATAACGCCGGCGAAGGGATTTGAGGggCTCCTccTCTCAAGTCCTTTGCCACTCTTTTTTGAGGTGCAAAgtgTTAAAAAAA
thiB Anti-Seq +4 Set 1	4B	CCGTTCTCAACGGGGTGCCACGCGTACGCGTGCGCTGAGAAAATACCCGTCGAACCTGATCCGGATAACGCCGGCGAAGGGATTTGAGGtgttCTCCTgacaTCTCAAGTCCTTTGCCACTCTTTTTTGAGGTGCAAAgtgTTAAAAAAA
thiB Anti-Seq +4 Set 2	SI 6	CCGTTCTCAACGGGGTGCCACGCGTACGCGTGCGCTGAGAAAATACCCGTCGAACCTGATCCGGATAACGCCGGCGAAGGGATTTGAGGgggtCTCCTgcccTCTCAAGTCCTTTGCCACTCTTTTTTGAGGTGCAAAgtgTTAAAAAAA
thiB Anti-Seq +6 Set 1	4B	CCGTTCTCAACGGGGTGCCACGCGTACGCGTGCGCTGAGAAAATACCCGTCGAACCTGATCCGGATAACGCCGGCGAAGGGATTTGAGGtgttcgCTCCTcggacaTCTCAAGTCCTTTGCCACTCTTTTTTGAGGTGCAAAgtgTTAAAAAAA
thiB Anti-Seq +6 Set 2	SI 6	CCGTTCTCAACGGGGTGCCACGCGTACGCGTGCGCTGAGAAAATACCCGTCGAACCTGATCCGGATAACGCCGGCGAAGGGATTTGAGGgggtgcCTCCTgcgcccTCTCAAGTCCTTTGCCACTCTTTTTTGAGGTGCAAAgtgTTAAAAAAA
thiB Anti-Seq +8 Set 1	4B	CCGTTCTCAACGGGGTGCCACGCGTACGCGTGCGCTGAGAAAATACCCGTCGAACCTGATCCGGATAACGCCGGCGAAGGGATTTGAGGtgttcgtgCTCCTtacggacaTCTCAAGTCCTTTGCCACTCTTTTTTGAGGTGCAAAgtgTTAAAAAAA
thiB Anti-Seq +8 Set 2	SI 6	CCGTTCTCAACGGGGTGCCACGCGTACGCGTGCGCTGAGAAAATACCCGTCGAACCTGATCCGGATAACGCCGGCGAAGGGATTTGAGGgggtgcgcCTCCTgcgcgcccTCTCAAGTCCTTTGCCACTCTTTTTTGAGGTGCAAAgtgTTAAAAAAA
